# Supplementary material for: Neural and behavioral reward responsiveness in early adolescence: longitudinal associations with childhood adversity and resilience
Source: Research Square preprint supplement (doi:10.21203/rs.3.rs-8414265/v1), 2026-01-30
Supplement: Supplementary file 1 [file 40bb4d04e35124cf4975869d.docx]

|  | **N** | **Proportion of sample (%)** |
| --- | --- | --- |
| **Demographics** |  |  |
| Sex |  |  |
| Male | 6188 | 52 |
| Female | 5677 | 48 |
| Missing | 3 | <0.1 |
|  |  |  |
| Race-ethnicity |  |  |
| Asian | 252 | 2 |
| Black | 1784 | 15 |
| Hispanic | 2410 | 20 |
| White | 6173 | 52 |
| Other | 1247 | 11 |
| Missing | 2 | <0.1 |
|  |  |  |
| **Available data** |  |  |
| BAS: Reward Responsiveness |  |  |
| Baseline (age 9/10) | 11819 |  |
| Follow-up 2 (age 11/12) | 10909 |  |
| Follow-up 4 (age 13/14) | 4719 |  |
|  |  |  |
| fMRI (Monetary Incentive Delay) |  |  |
| Baseline (age 9/10) | 9164 |  |
| Follow-up 2 (age 11/12) | 6735 |  |
| Follow-up 4 (age 13/14) | 2675 |  |
