# Supplementary material for: Neural and behavioral reward responsiveness in early adolescence: longitudinal associations with childhood adversity and resilience
Source: Research Square preprint supplement (doi:10.21203/rs.3.rs-8414265/v1), 2026-01-30
Supplement: Supplementary file 2 [file a00f86d4753a2f4a122881b6.docx]

**Supplementary Material for *Neural and behavioral reward responsiveness in early adolescence: longitudinal associations with childhood adversity and resilience***

**BIS/BAS Item Description**

| **BIS/BAS Module** | **Item Number** | **Wording** |
| --- | --- | --- |
| Behavioral Inhibition | BIS1 | *‘I worry about making mistakes’* |
|  | BIS2 | *‘Criticism or scolding hurts me quite a bit’* |
|  | BIS3 | *‘I feel pretty worried or upset when I think or know somebody is angry at me’* |
|  | BIS4 | *‘I feel worried when I think I have done poorly at something important* |
| Reward Responsiveness | RWD1 | *‘When I get something I want, I feel excited and energized’* |
|  | RWD2 | *‘When I'm doing well at something I love to keep at it’* |
|  | RWD3 | *‘It would excite me to win a contest’* |
|  | RWD4 | *‘When I see an opportunity for something I like I get excited right away’* |
| Drive | DRIVE1 | *‘When I want something I usually go all-out to get it’* |
|  | DRIVE2 | *‘I go out of my way to get things I want’* |
|  | DRIVE3 | *‘If I see a chance to get something I want I move on it right away’* |
|  | DRIVE4 | *‘When I go after something I use a no holds barred approach* |

***Table S1:*** Table of items in the revised BIS/BAS questionnaire, adapted from Pagliaccio et al. (2015)1,2. The Reward Responsiveness module used in the analyses is highlighted in blue. Respondents have the option to rank each item on 4-point Likert scale (‘Strongly Agree’-‘Strongly Disagree’, ‘Very true for me’-‘Very false for me’, or ‘Not True’-‘Very True’). Higher scores on BAS Reward responsiveness module indicate higher levels of reward responsiveness.

**Adversity Factor Item Missingness**

***Table S2:*** Missingness for each observed survey variable in the factor loadings matrix.

**Multiple Imputation Validation**

**
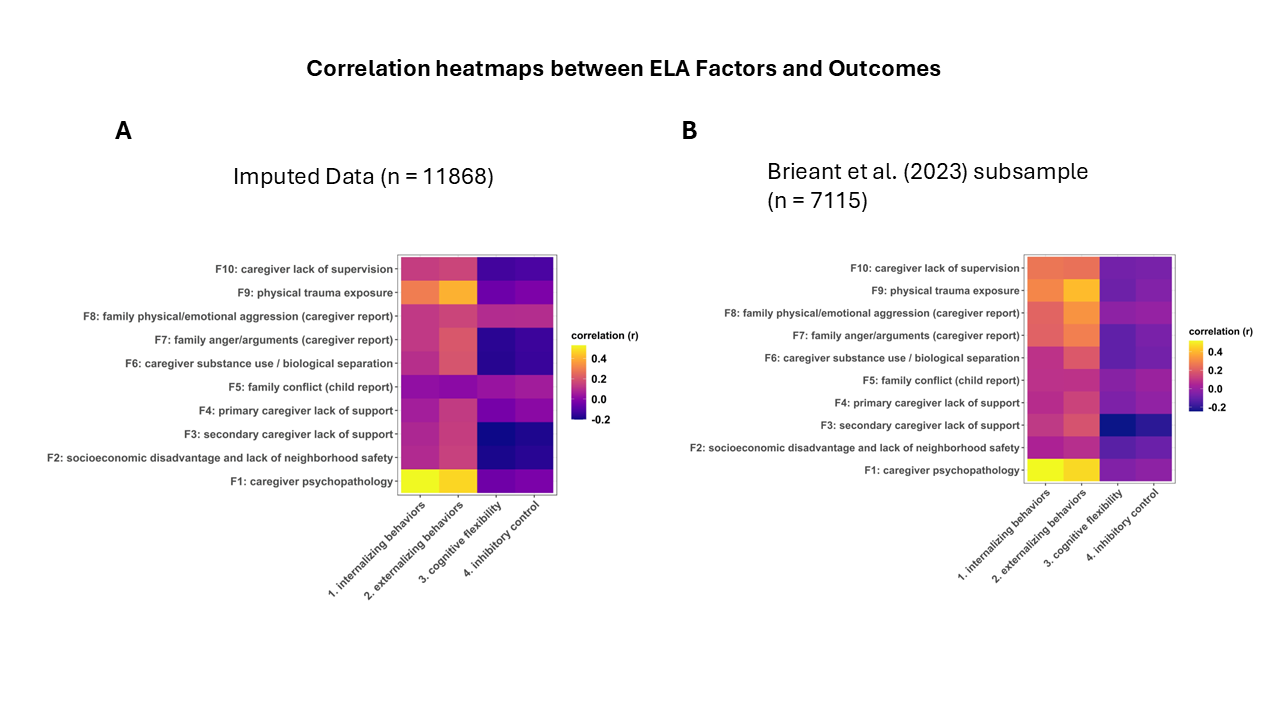
**

***Figure S1:*** Comparison between (**A**) 1 imputed dataset (n=11868) and (**B**) the Brieant et al (2023) sample (7115)3. Correlation heatmaps of adversity factors and psychological outcomes at baseline.

**
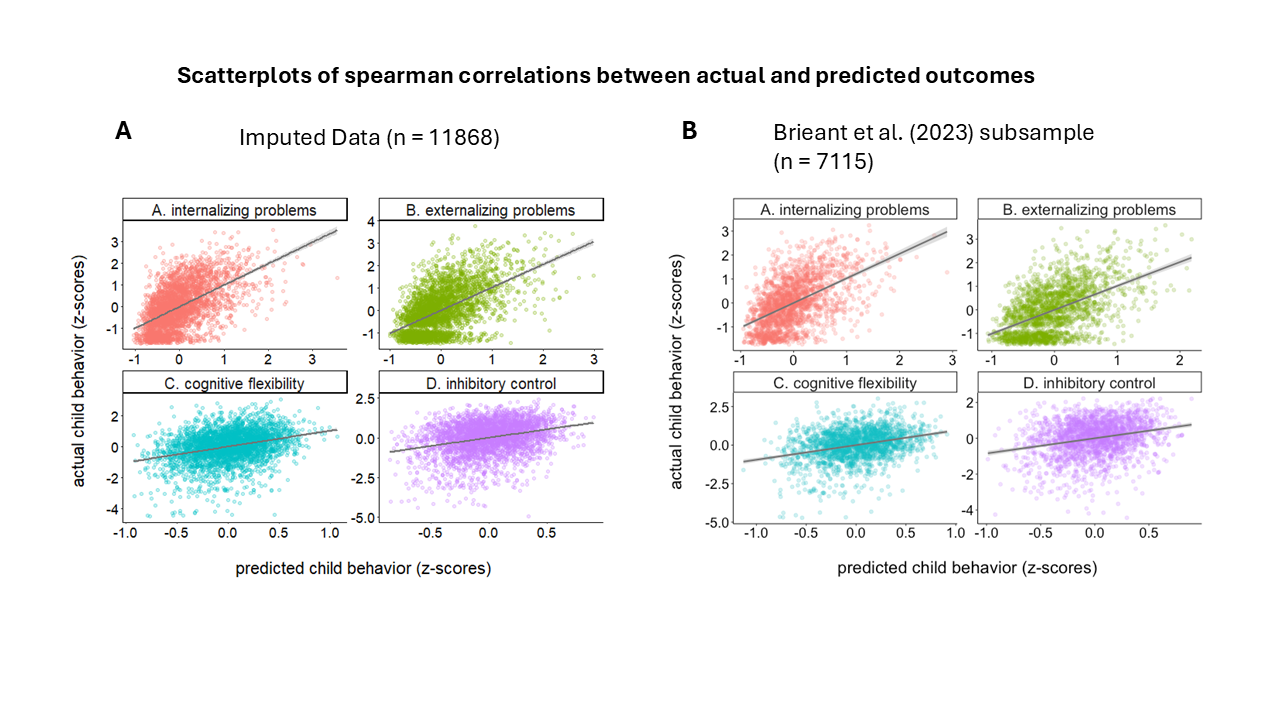
**

***Figure S2:*** Comparison between (**A**)1 imputed dataset (n=11868) and (**B**) the Brieant et al. (2023) sample (7115)3. Scatterplots of spearman correlation between actual and predicted psychological outcomes at baseline using model parameters from Brieant et al (2023).

**BAS Reward Responsiveness and Age**


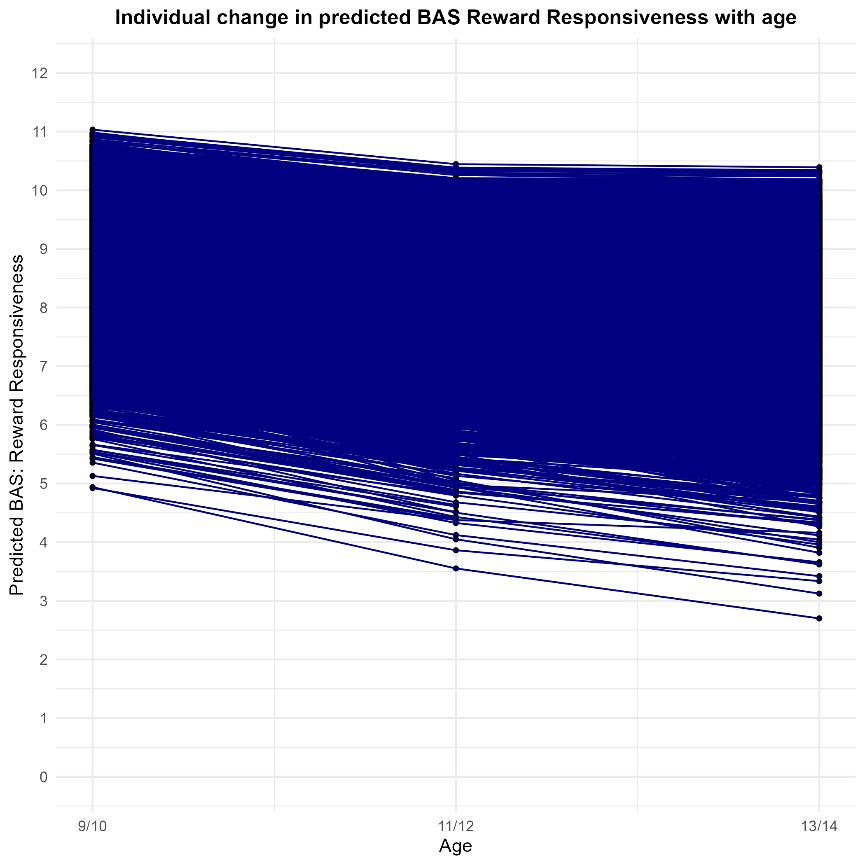


***Figure S3:*** Plot of predicted individual BAS reward responsiveness change with age using BAS Reward Responsiveness and adversity random slope model.


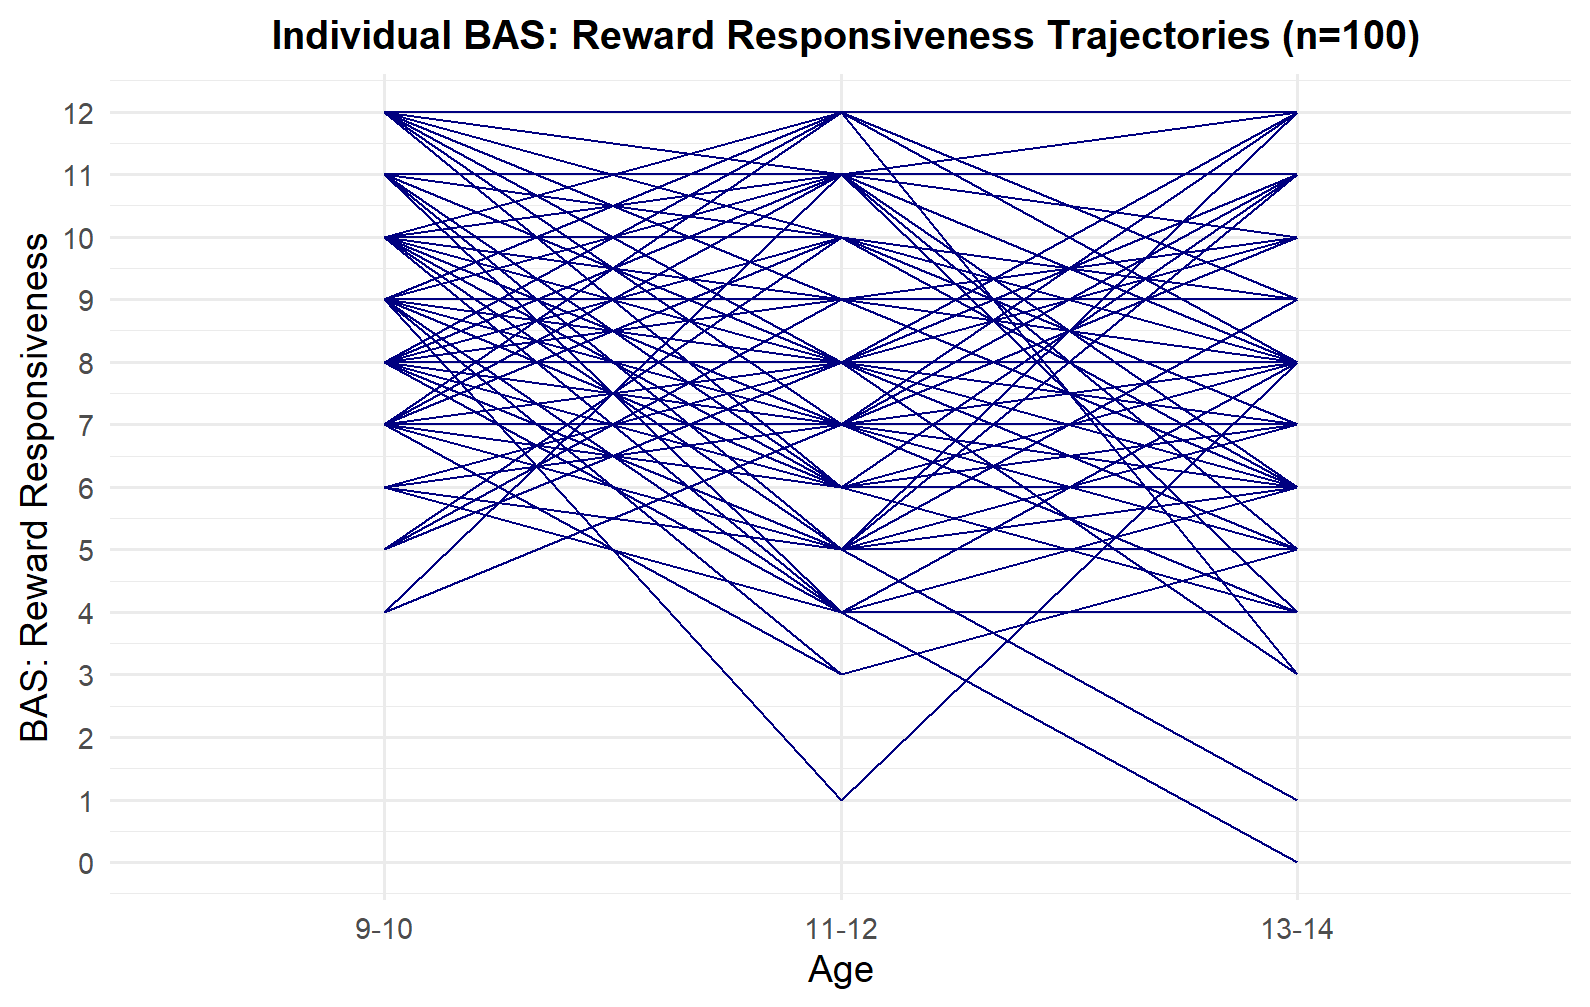


***Figure S4:*** Plot of 100 randomly selected individual BAS reward responsiveness trajectories (with data available at all 3 timepoints) with age.

**
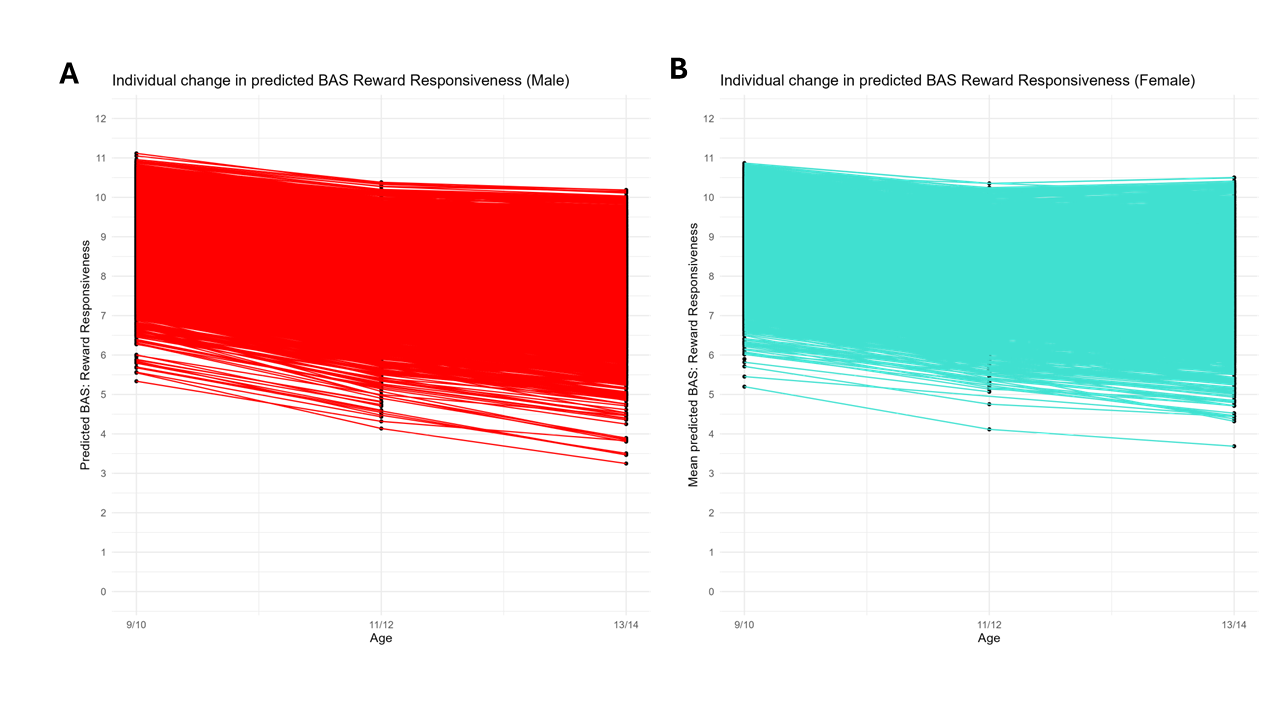
**

***Figure S5:*** Plots of predicted individual reward responsiveness change with age using sex-stratified models of reward responsiveness and adversity factors. (**A**) Male. (**B**) Female.

**Neural Reward Responsiveness and Age**

| **Model** | **estimate** | **std.error** | **p.value** | **conf.low** | **conf.high** |
| --- | --- | --- | --- | --- | --- |
| Anticipatory Nacc | 0.002038 | 0.004684 | 6.63E-01 | -0.00714 | 1.12E-02 |
| Anticipatory Caudate | 0.015778 | 0.003756 | 2.67E-05 | 0.008416 | 0.023141 |
| Anticipatory Putamen | 1.02E-02 | 0.003101 | 1.02E-03 | 0.004112 | 0.01627 |
| Consummatory Nacc | -0.00108 | 0.004741 | 8.20E-01 | -0.01037 | 0.008215 |
| Consummatory Caudate | -0.00187 | 0.003977 | 6.38E-01 | -0.00967 | 0.005922 |
| Consummatory Putamen | -0.00568 | 0.003347 | 8.98E-02 | -0.01224 | 0.000883 |

**Table S3:** Pooled estimates for the age term in the models of ELA factors and neural reward responsiveness, using monetary incentive delay contrasts for each subcortical region. Nucleus accumbens is abbreviated to *Nacc*.

| **Model** | **estimate** | **std.error** | **p.value** | **conf.low** | **conf.high** |
| --- | --- | --- | --- | --- | --- |
| Anticipatory Nacc | -0.0024 | 0.001262 | 5.73E-02 | -0.00487 | 7.43E-05 |
| Anticipatory Caudate | -0.00361 | 0.001014 | 3.79E-04 | -0.00559 | -0.00162 |
| Anticipatory Putamen | -1.49E-03 | 0.000838 | 7.62E-02 | -0.00313 | 0.000156 |
| Consummatory Nacc | -0.00119 | 0.001279 | 3.54E-01 | -0.00369 | 0.001321 |
| Consummatory Caudate | 0.000423 | 0.00107 | 6.92E-01 | -0.00167 | 0.002521 |
| Consummatory Putamen | 0.00062 | 0.000903 | 4.92E-01 | -0.00115 | 0.002389 |

**Table S4:** Pooled estimates for the age squared term in the models of ELA factors and neural reward responsiveness, using monetary incentive delay contrasts for each subcortical region. Nucleus accumbens is abbreviated to *Nacc*.

**Supplementary analysis: Age 9/10 Adversity, Perceived Racial Discrimination and BAS Reward Responsiveness**


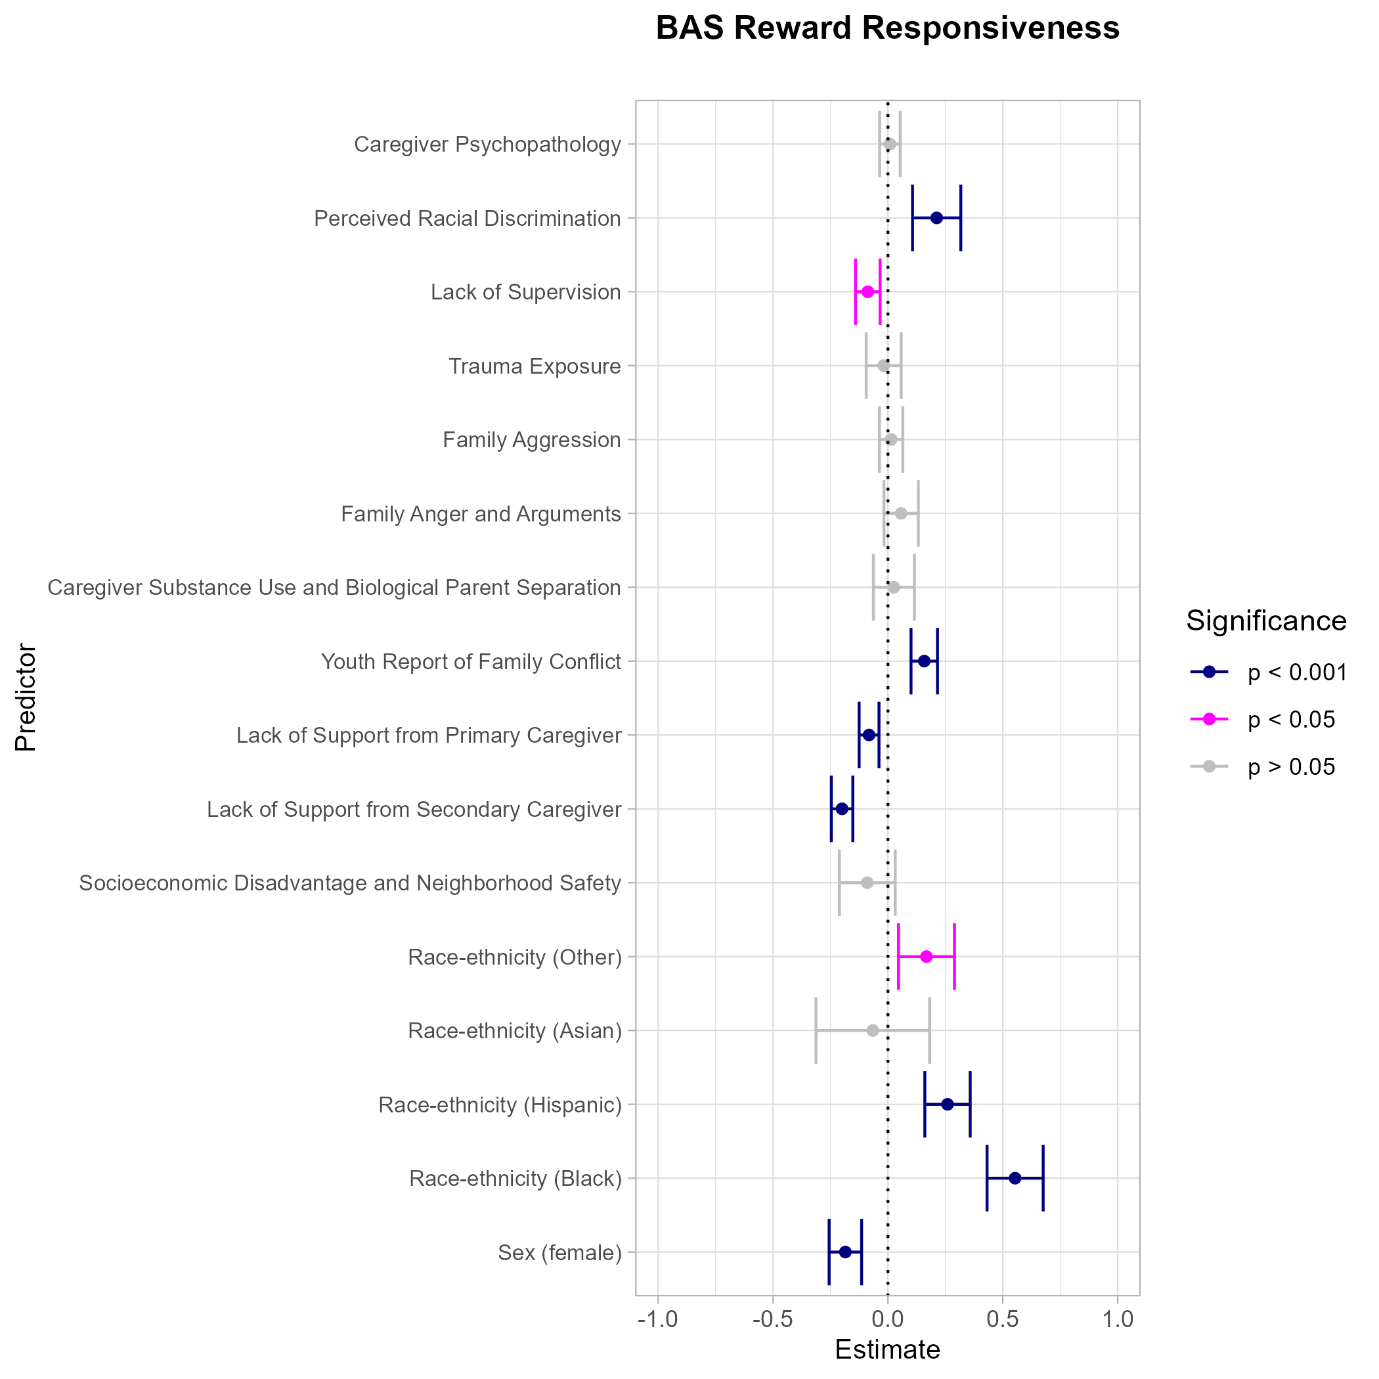


***Figure S6:*** Forest plot of pooled coefficients of models of BAS Reward Responsiveness and adversity factors including Perceived Racial Discrimination as a covariate in random slope model. Significance level is indicated by color.

**Supplementary analysis: Age 9/10 Adversity, Perceived Racial Discrimination and anticipatory reward responsiveness in the striatum**


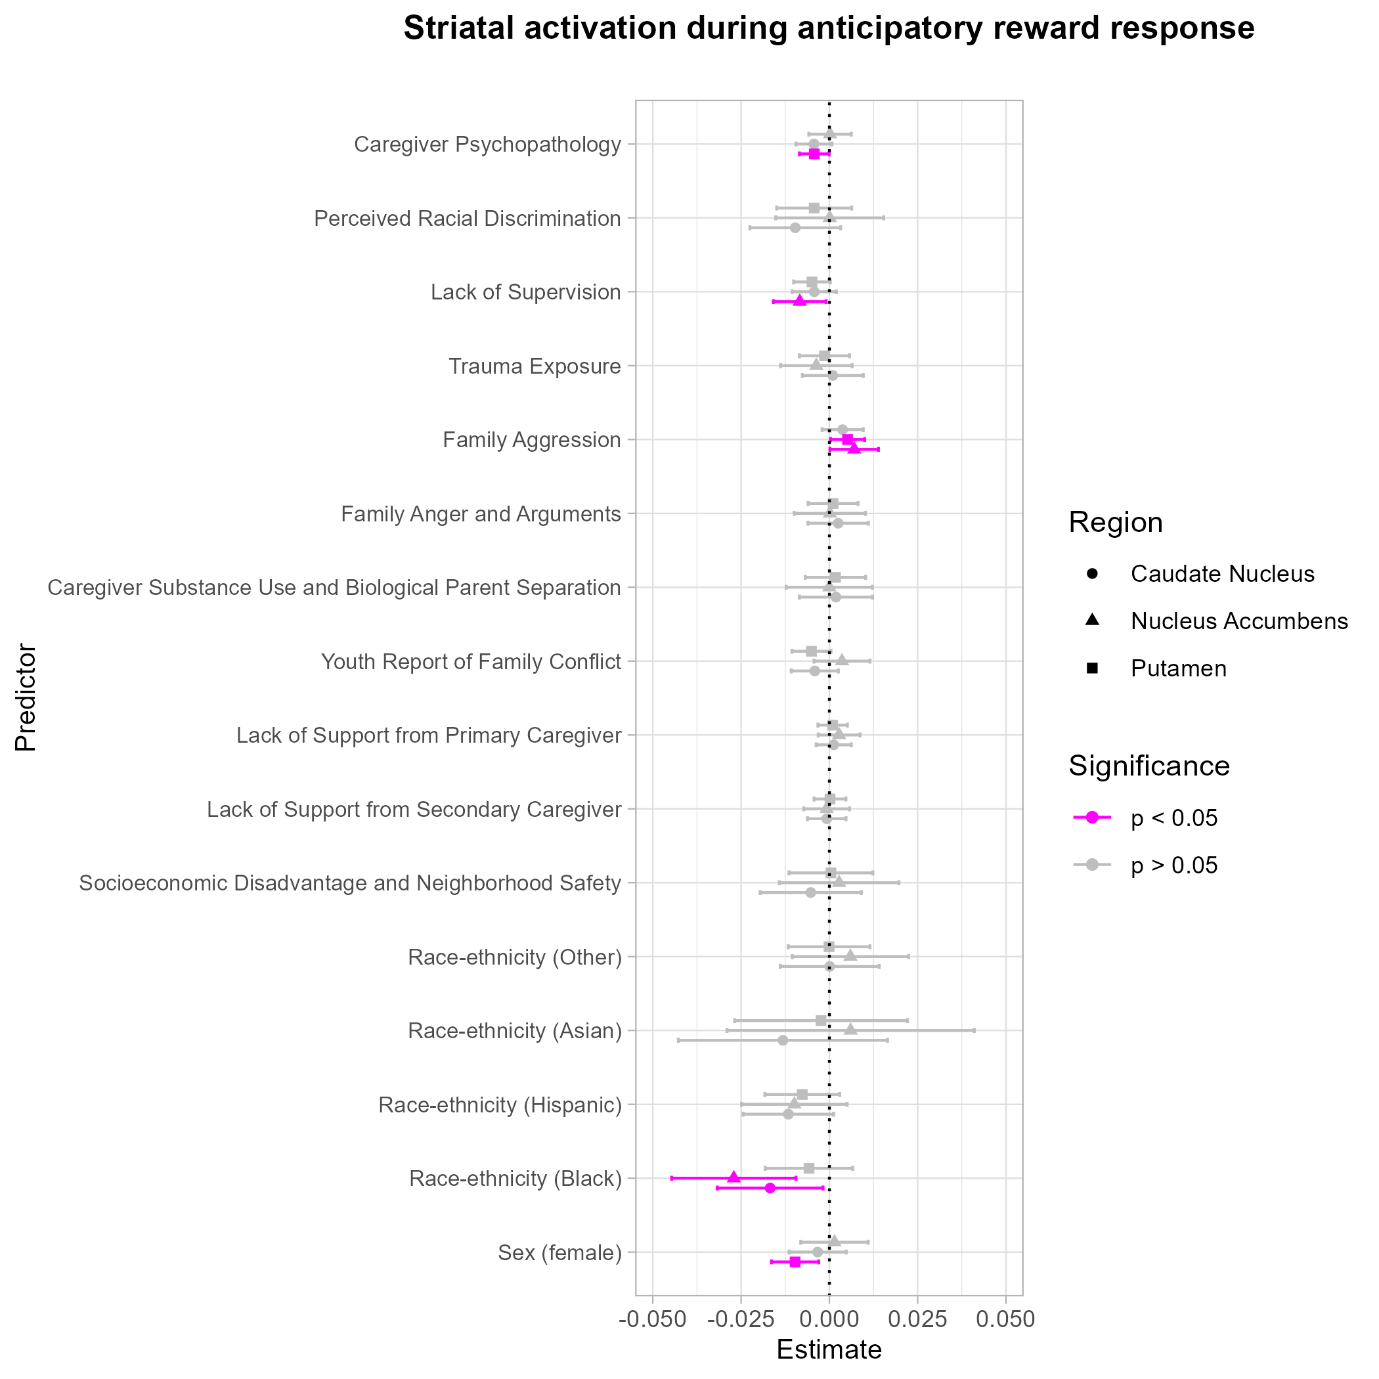


***Figure S7:*** Forest plot of pooled coefficients of models of anticipatory reward response during the monetary incentive delay task, adversity and resilience factors including Perceived Racial Discrimination as a covariate. Significance level is indicated by color, and striatal subregion by shape.

**Supplementary analysis: Age 9/10 Adversity, Perceived Racial Discrimination and consummatory reward responsiveness in the striatum**


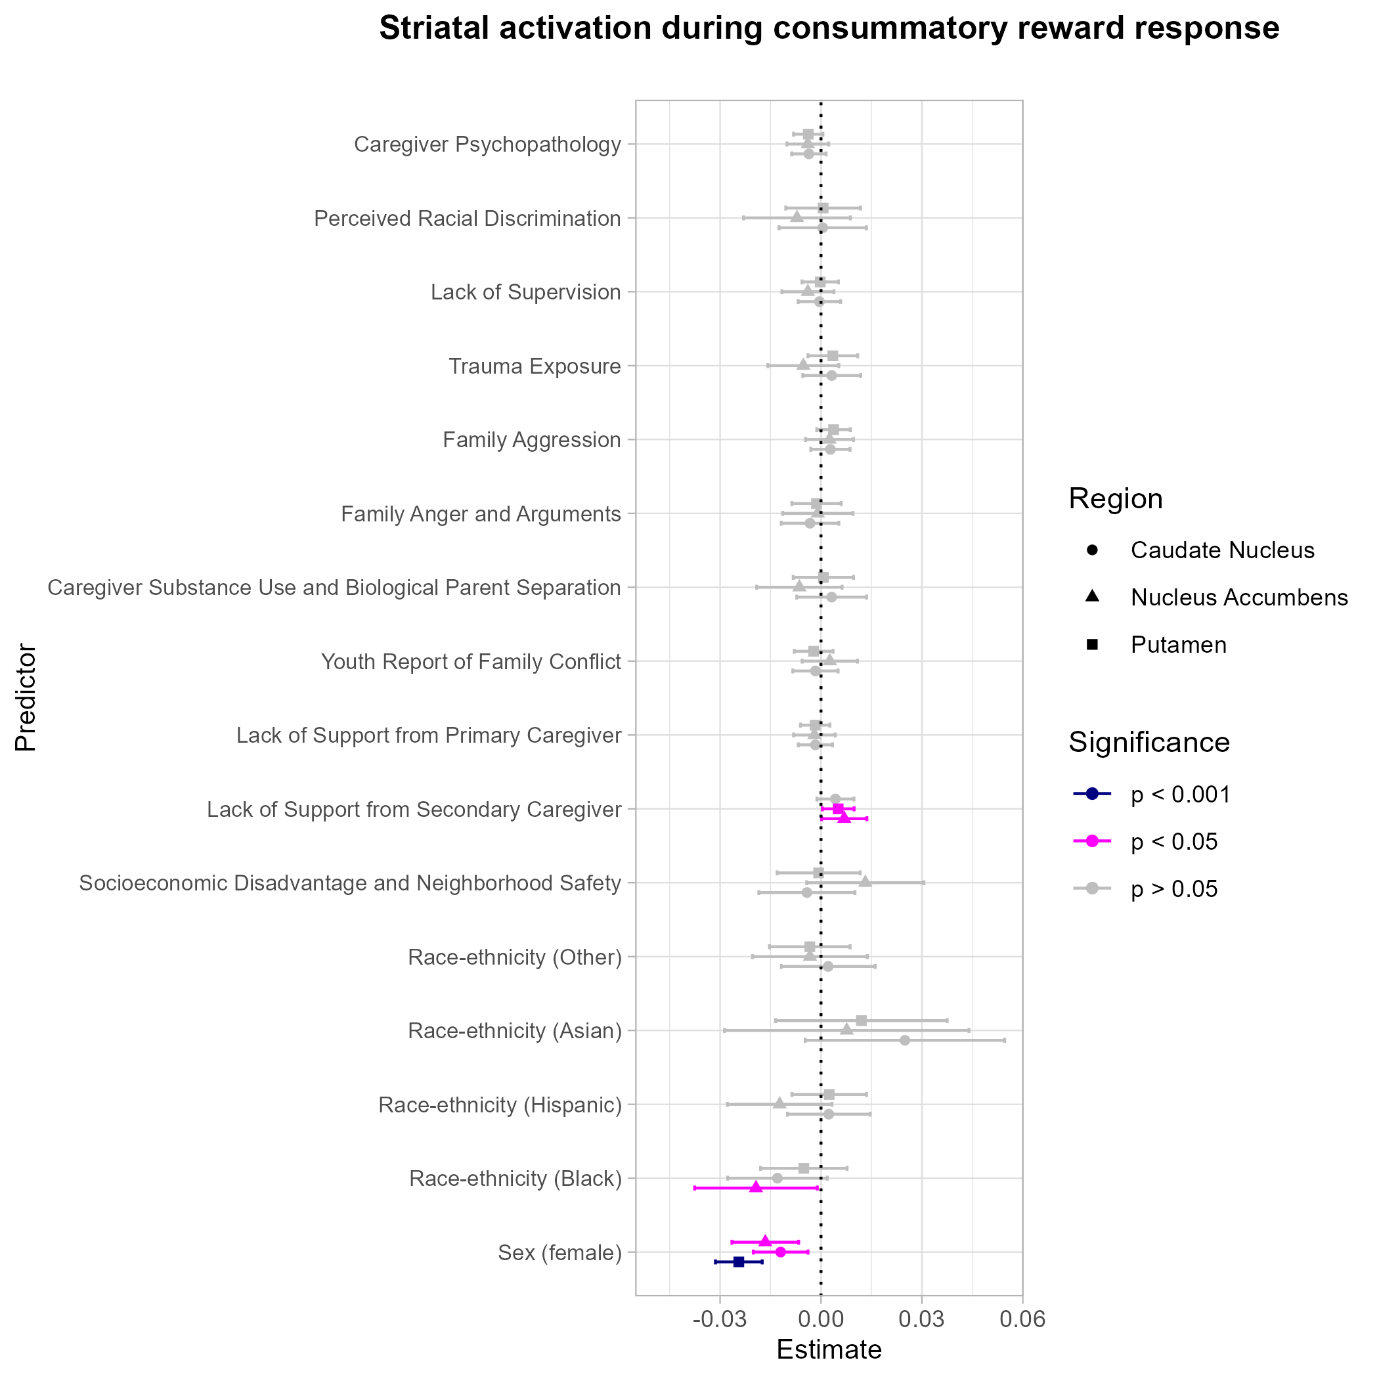


***Figure S8:*** Forest plot of pooled coefficients of models of anticipatory reward response during the monetary incentive delay task, adversity and resilience factors including Perceived Racial Discrimination as a covariate. Significance level is indicated by color, and striatal subregion by shape.

**Sensitivity Analysis: Poisson regression of baseline BAS Reward Responsiveness**

| **term** | **estimate** | **std.error** | **p.value** | **conf.low** | **conf.high** |
| --- | --- | --- | --- | --- | --- |
| (Intercept) | 2.169318 | 0.00538 | 0 | 2.158773 | 2.179863 |
| race_ethnicityBlack | 0.071987 | 0.010094 | 1.06E-12 | 0.052201 | 0.091774 |
| race_ethnicityHispanic | 0.042028 | 0.008531 | 8.50E-07 | 0.025305 | 0.05875 |
| race_ethnicityAsian | 0.012099 | 0.022476 | 0.590392 | -0.03196 | 0.056155 |
| race_ethnicityOther | 0.025061 | 0.010582 | 0.017885 | 0.004319 | 0.045803 |
| sexFemale | -0.03414 | 0.006291 | 5.87E-08 | -0.04647 | -0.0218 |
| cg_psych | 0.000163 | 0.003871 | 0.966363 | -0.00742 | 0.007751 |
| ses_dis_nsafety | 0.00373 | 0.010457 | 0.721321 | -0.01677 | 0.02423 |
| cg2_lack_support | -0.02962 | 0.004201 | 1.88E-12 | -0.03786 | -0.02139 |
| cg1_lack_support | -0.01394 | 0.003881 | 0.000331 | -0.02155 | -0.00633 |
| yp_family_conflict | 0.032874 | 0.005116 | 1.36E-10 | 0.022846 | 0.042901 |
| cg_sub_use_bio_sep | 0.002038 | 0.007695 | 0.791091 | -0.01305 | 0.017123 |
| family_anger_arg | 0.012245 | 0.006504 | 0.059764 | -0.0005 | 0.024994 |
| family_aggression | 0.001754 | 0.004362 | 0.687645 | -0.0068 | 0.010305 |
| trauma_exposure | -0.00892 | 0.006711 | 0.184084 | -0.02207 | 0.00424 |
| lack_supervision | -0.01163 | 0.004722 | 0.013758 | -0.02089 | -0.00238 |

***Table S5:*** Output of Poisson regression sensitivity analysis of adversity factors and BAS: Reward Responsiveness at the baseline wave.

| **term** | **estimate** | **std.error** | **p.value** | **conf.low** | **conf.high** |
| --- | --- | --- | --- | --- | --- |
| (Intercept) | 2.174226 | 0.005225 | 0 | 2.163985 | 2.184468 |
| race_ethnicityBlack | 0.083969 | 0.008901 | 4.68E-21 | 0.066522 | 0.101415 |
| race_ethnicityHispanic | 0.041979 | 0.008083 | 2.10E-07 | 0.026135 | 0.057823 |
| race_ethnicityAsian | -0.01008 | 0.022143 | 0.649067 | -0.05348 | 0.033327 |
| race_ethnicityOther | 0.025624 | 0.010499 | 0.014677 | 0.005044 | 0.046203 |
| sexFemale | -0.04765 | 0.006323 | 5.23E-14 | -0.06004 | -0.03525 |
| ps_behav | 0.035089 | 0.003386 | 4.65E-25 | 0.028452 | 0.041726 |
| pos_school_env | 0.017001 | 0.003313 | 2.91E-07 | 0.010508 | 0.023494 |

***Table S6:*** Output of Poisson regression sensitivity analysis of resilience factors and BAS: Reward Responsiveness at the baseline wave.

**Supplementary analysis: Sex-stratified models including pubertal development scale**

**
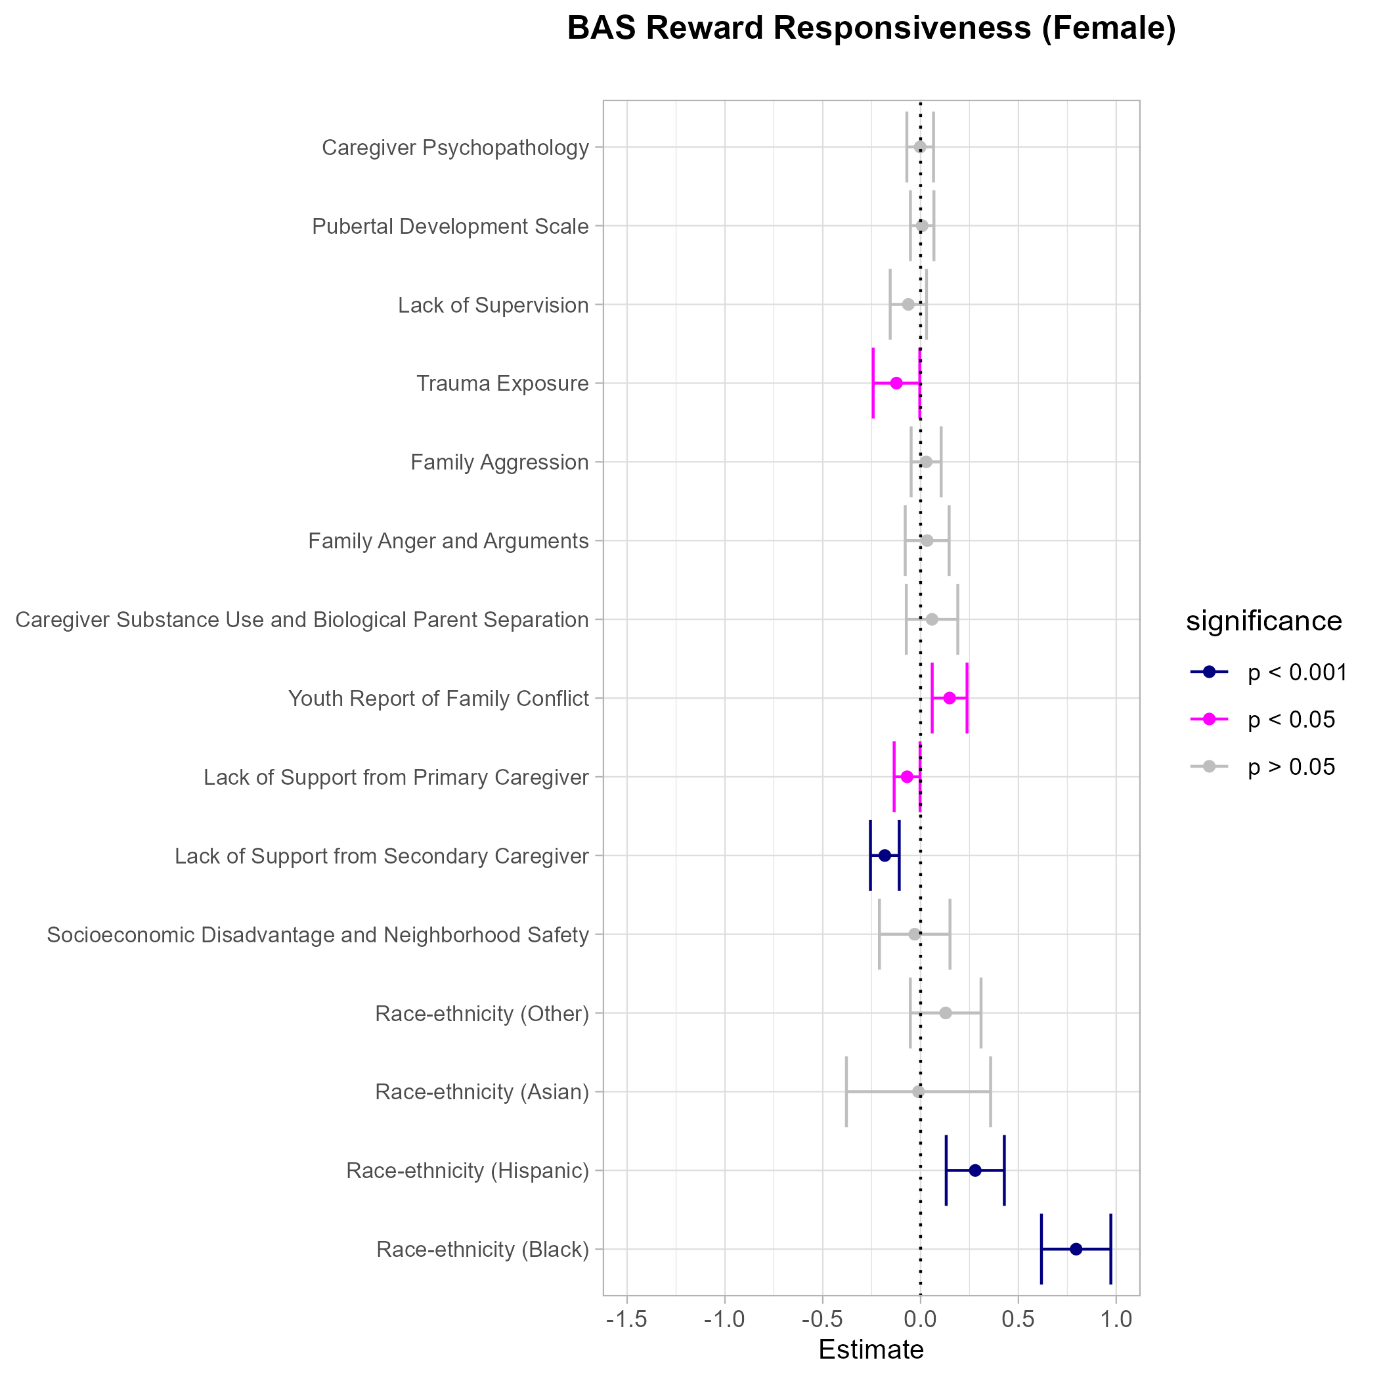
**

***Figure S9:*** Forest plot of pooled coefficients of models of BAS Reward Responsiveness and adversity factors within the female sample – including female pubertal development score as a covariate in the random slope model. Significance level is indicated by color.

**
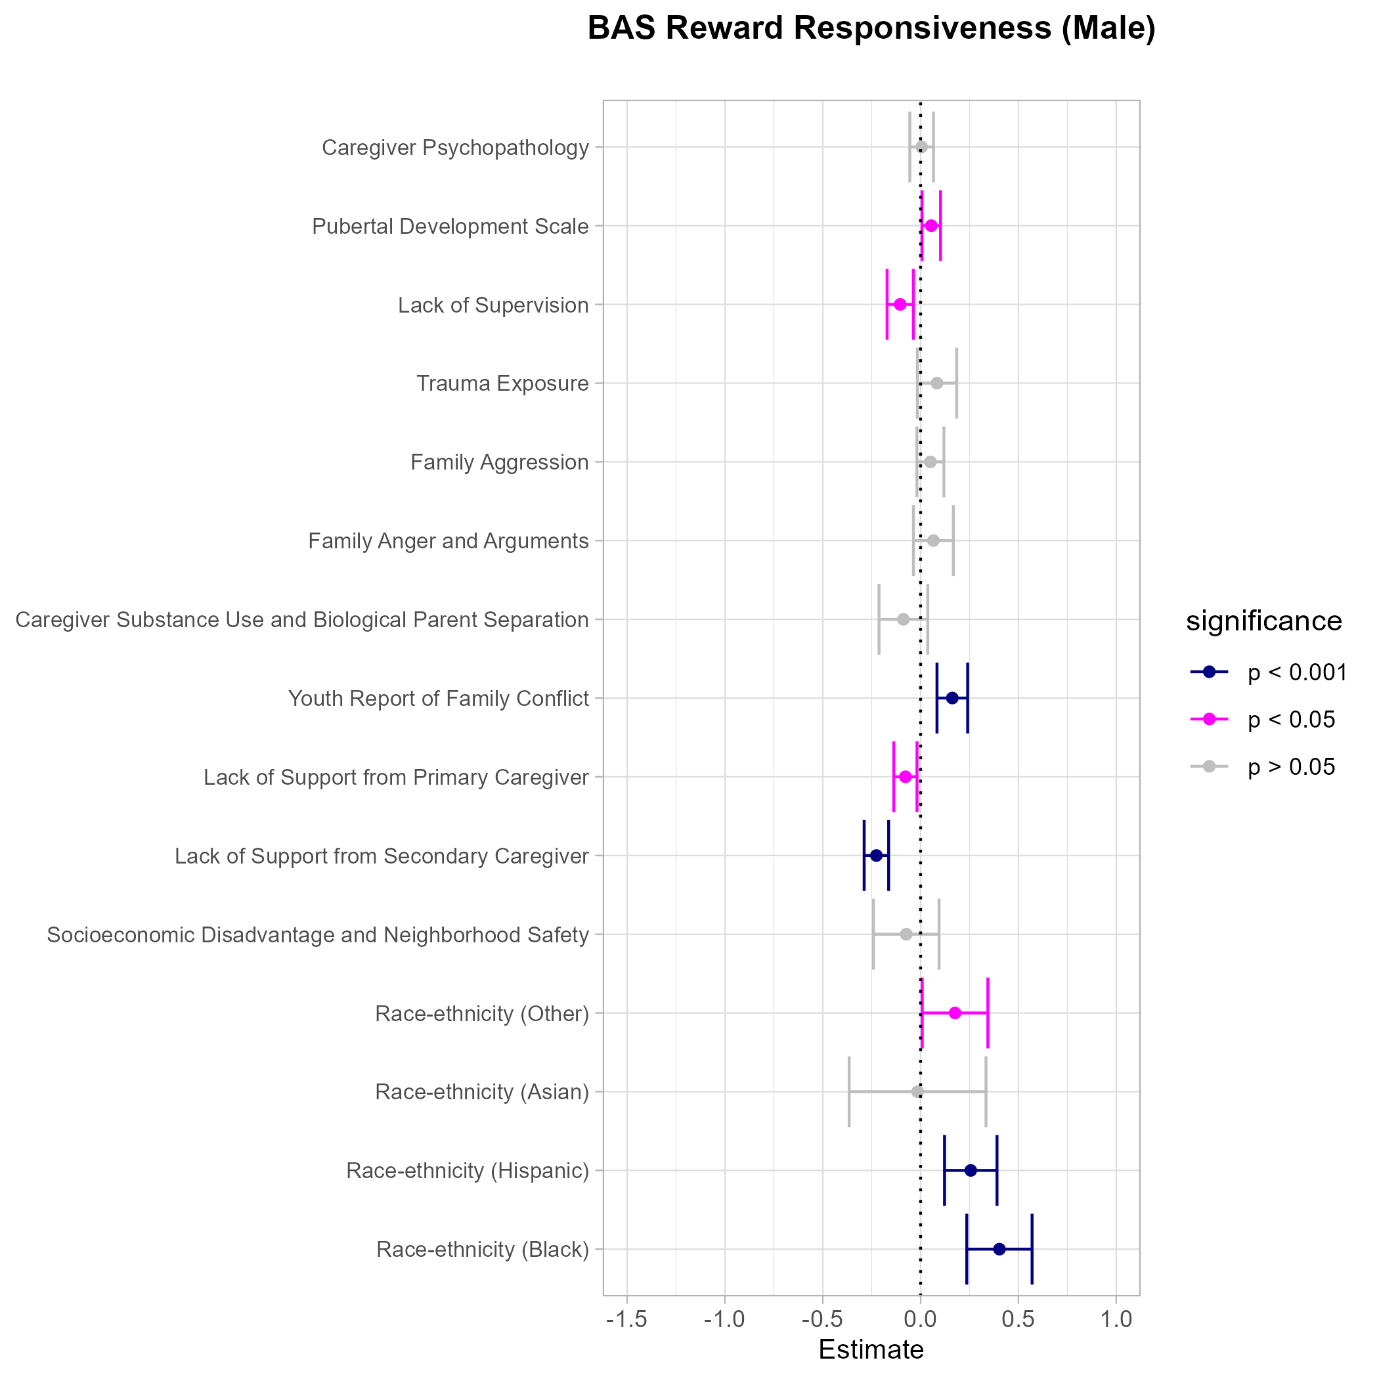
**

***Figure S10:*** Forest plot of pooled coefficients of models of BAS Reward Responsiveness and adversity factors within the male sample – including female pubertal development score as a covariate in the random slope model. Significance level is indicated by color.

**Unadjusted models**

*BAS Reward Responsiveness*

| **term** | **estimate** | **std.error** | **p.value** | **conf.low** | **conf.high** |
| --- | --- | --- | --- | --- | --- |
| (Intercept) | 8.82428 | 0.022476 | 0 | 8.780225 | 8.868335 |
| cg_psych | -0.02792 | 0.021988 | 0.204185 | -0.07102 | 0.015178 |
| ses_dis_nsafety | 0.140812 | 0.055558 | 0.011274 | 0.031908 | 0.249717 |
| cg2_lack_support | -0.18698 | 0.022947 | 3.85E-16 | -0.23196 | -0.142 |
| cg1_lack_support | -0.08097 | 0.021285 | 0.000143 | -0.12269 | -0.03925 |
| yp_family_conflict | 0.144424 | 0.028457 | 3.90E-07 | 0.088647 | 0.200201 |
| cg_sub_use_bio_sep | -0.05142 | 0.043682 | 0.239196 | -0.13704 | 0.034206 |
| family_anger_arg | 0.107108 | 0.036765 | 0.003579 | 0.035047 | 0.179169 |
| family_aggression | 0.038846 | 0.025023 | 0.120573 | -0.0102 | 0.087892 |
| trauma_exposure | -0.03189 | 0.037324 | 0.392831 | -0.10505 | 0.041266 |
| lack_supervision | -0.08897 | 0.025904 | 0.000594 | -0.13974 | -0.0382 |
| age | -0.56799 | 0.025654 | 1.14E-107 | -0.61827 | -0.5177 |
| age_sq | 0.066389 | 0.006815 | 2.17E-22 | 0.053032 | 0.079746 |

***Table S7:*** Pooled coefficients for unadjusted models of adversity and BAS Reward Responsiveness.

| **term** | **estimate** | **std.error** | **p.value** | **conf.low** | **conf.high** |
| --- | --- | --- | --- | --- | --- |
| (Intercept) | 8.823143 | 0.022503 | 0 | 8.779036 | 8.867249 |
| pos_school_env | 0.096327 | 0.018168 | 1.15E-07 | 0.060718 | 0.131937 |
| ps_behav | 0.237772 | 0.018134 | 3.69E-39 | 0.202229 | 0.273316 |
| age | -0.56572 | 0.025667 | 9.83E-107 | -0.61603 | -0.51542 |
| age_sq | 0.065379 | 0.006817 | 9.41E-22 | 0.052018 | 0.07874 |

***Table S8:*** Pooled coefficients for unadjusted models of resilience and BAS Reward Responsiveness.

*Anticipatory reward activation*

*Nucleus accumbens*

| *term* | *estimate* | *std.error* | *p.value* | *conf.low* | *conf.high* |
| --- | --- | --- | --- | --- | --- |
| *(Intercept)* | *0.096513* | *0.006165* | *6.87E-55* | *0.084429* | *0.108597* |
| *cg_psych* | *0.001542* | *0.002951* | *0.601243* | *-0.00424* | *0.007327* |
| *ses_dis_nsafety* | *-0.00534* | *0.007846* | *0.495891* | *-0.02072* | *0.010037* |
| *cg2_lack_support* | *-0.00145* | *0.003177* | *0.64835* | *-0.00768* | *0.004778* |
| *cg1_lack_support* | *0.004195* | *0.002912* | *0.149714* | *-0.00151* | *0.009902* |
| *yp_family_conflict* | *0.003538* | *0.003913* | *0.365884* | *-0.00413* | *0.011208* |
| *cg_sub_use_bio_sep* | *0.001749* | *0.005968* | *0.769526* | *-0.00995* | *0.013447* |
| *family_anger_arg* | *-0.00163* | *0.004988* | *0.743526* | *-0.01141* | *0.008145* |
| *family_aggression* | *0.007962* | *0.003376* | *0.018343* | *0.001346* | *0.014579* |
| *trauma_exposure* | *-0.00192* | *0.004997* | *0.700344* | *-0.01172* | *0.007871* |
| *lack_supervision* | *-0.01045* | *0.003604* | *0.003749* | *-0.01751* | *-0.00338* |
| *age* | *0.002051* | *0.004682* | *0.661323* | *-0.00713* | *0.011229* |
| *age_sq* | *-0.00237* | *0.001262* | *0.060623* | *-0.00484* | *0.000106* |

***Table S9:*** Pooled coefficients for unadjusted models of adversity and anticipatory reward activation (nucleus accumbens).

| *term* | *estimate* | *std.error* | *p.value* | *conf.low* | *conf.high* |
| --- | --- | --- | --- | --- | --- |
| *(Intercept)* | *0.097211* | *0.006212* | *7.64E-55* | *0.085035* | *0.109388* |
| *pos_school_env* | *0.002342* | *0.002516* | *0.351791* | *-0.00259* | *0.007274* |
| *ps_behav* | *-0.0013* | *0.002502* | *0.604529* | *-0.0062* | *0.003609* |
| *age* | *0.001909* | *0.004691* | *0.684111* | *-0.00729* | *0.011103* |
| *age_sq* | *-0.00233* | *0.001264* | *0.065051* | *-0.00481* | *0.000145* |

***Table S10:*** Pooled coefficients for unadjusted models of resilience and anticipatory reward activation (nucleus accumbens).

*Caudate nucleus*

| *term* | *estimate* | *std.error* | *p.value* | *conf.low* | *conf.high* |
| --- | --- | --- | --- | --- | --- |
| *(Intercept)* | *0.098685* | *0.005829* | *8.23E-64* | *0.087259* | *0.11011* |
| *cg_psych* | *-0.00196* | *0.002512* | *0.43409* | *-0.00689* | *0.002959* |
| *ses_dis_nsafety* | *-0.01493* | *0.006707* | *0.026114* | *-0.02807* | *-0.00178* |
| *cg2_lack_support* | *-0.00164* | *0.002693* | *0.542112* | *-0.00692* | *0.003637* |
| *cg1_lack_support* | *0.002868* | *0.002457* | *0.243156* | *-0.00195* | *0.007683* |
| *yp_family_conflict* | *-0.00274* | *0.003315* | *0.408699* | *-0.00924* | *0.003759* |
| *cg_sub_use_bio_sep* | *0.004822* | *0.005103* | *0.344652* | *-0.00518* | *0.014825* |
| *family_anger_arg* | *0.000524* | *0.004258* | *0.902074* | *-0.00782* | *0.00887* |
| *family_aggression* | *0.002012* | *0.002872* | *0.483538* | *-0.00362* | *0.007641* |
| *trauma_exposure* | *0.001781* | *0.004281* | *0.677429* | *-0.00661* | *0.010174* |
| *lack_supervision* | *-0.00542* | *0.00305* | *0.07557* | *-0.0114* | *0.000558* |
| *age* | *0.015784* | *0.003755* | *2.65E-05* | *0.008423* | *0.023144* |
| *age_sq* | *-0.00358* | *0.001014* | *0.000418* | *-0.00557* | *-0.00159* |

***Table S11:*** Pooled coefficients for unadjusted models of adversity and anticipatory reward activation (caudate nucleus).

| *term* | *estimate* | *std.error* | *p.value* | *conf.low* | *conf.high* |
| --- | --- | --- | --- | --- | --- |
| *(Intercept)* | *0.100166* | *0.006201* | *2.69E-58* | *0.088011* | *0.11232* |
| *pos_school_env* | *0.000938* | *0.002131* | *0.659736* | *-0.00324* | *0.005115* |
| *ps_behav* | *0.002553* | *0.00212* | *0.22857* | *-0.0016* | *0.006709* |
| *age* | *0.015468* | *0.003761* | *3.93E-05* | *0.008096* | *0.022841* |
| *age_sq* | *-0.00347* | *0.001016* | *0.000627* | *-0.00547* | *-0.00148* |

***Table S12:*** Pooled coefficients for unadjusted models of resilience and anticipatory reward activation (caudate nucleus).

*Putamen*

| term | estimate | std.error | p.value | conf.low | conf.high |
| --- | --- | --- | --- | --- | --- |
| (Intercept) | 0.06206 | 0.004903 | 1.44E-36 | 0.05245 | 0.071671 |
| cg_psych | -0.00339 | 0.002081 | 0.103049 | -0.00747 | 0.000686 |
| ses_dis_nsafety | -0.00488 | 0.005563 | 0.37993 | -0.01579 | 0.006022 |
| cg2_lack_support | 8.64E-05 | 0.002237 | 0.969184 | -0.0043 | 0.004471 |
| cg1_lack_support | 0.00188 | 0.002078 | 0.365834 | -0.0022 | 0.005955 |
| yp_family_conflict | -0.0042 | 0.002749 | 0.126357 | -0.00959 | 0.001186 |
| cg_sub_use_bio_sep | 0.002279 | 0.004207 | 0.588062 | -0.00597 | 0.010525 |
| family_anger_arg | 0.000656 | 0.003521 | 0.852249 | -0.00625 | 0.007558 |
| family_aggression | 0.004466 | 0.002382 | 0.060872 | -0.0002 | 0.009136 |
| trauma_exposure | 0.000216 | 0.003538 | 0.951416 | -0.00672 | 0.007151 |
| lack_supervision | -0.0046 | 0.002532 | 0.069432 | -0.00956 | 0.000366 |
| age | 0.010327 | 0.0031 | 0.000867 | 0.00425 | 0.016404 |
| age_sq | -0.0015 | 0.000837 | 0.073338 | -0.00314 | 0.000142 |

***Table S13:*** Pooled coefficients for unadjusted models of adversity and anticipatory reward activation (putamen).

| term | estimate | std.error | p.value | conf.low | conf.high |
| --- | --- | --- | --- | --- | --- |
| (Intercept) | 0.063049 | 0.00501 | 3.65E-36 | 0.053228 | 0.072869 |
| pos_school_env | 0.002807 | 0.001767 | 0.11206 | -0.00066 | 0.00627 |
| ps_behav | 0.000311 | 0.001758 | 0.859788 | -0.00313 | 0.003756 |
| age | 0.010035 | 0.003105 | 0.001232 | 0.003949 | 0.016121 |
| age_sq | -0.00142 | 0.000839 | 0.089571 | -0.00307 | 0.00022 |

***Table S14:*** Pooled coefficients for unadjusted models of resilience and anticipatory reward activation (putamen).

*Consummatory reward activation*

*Nucleus accumbens*

| *term* | *estimate* | *std.error* | *p.value* | *conf.low* | *conf.high* |
| --- | --- | --- | --- | --- | --- |
| *(Intercept)* | *0.145726* | *0.006605* | *1.69E-106* | *0.132779* | *0.158673* |
| *cg_psych* | *-0.00296* | *0.003046* | *0.331761* | *-0.00893* | *0.003014* |
| *ses_dis_nsafety* | *0.002869* | *0.0081* | *0.723234* | *-0.01301* | *0.018748* |
| *cg2_lack_support* | *0.005545* | *0.003303* | *0.093246* | *-0.00093* | *0.012019* |
| *cg1_lack_support* | *-0.00111* | *0.003045* | *0.715481* | *-0.00708* | *0.00486* |
| *yp_family_conflict* | *0.005344* | *0.004066* | *0.188789* | *-0.00263* | *0.013314* |
| *cg_sub_use_bio_sep* | *-0.00368* | *0.006201* | *0.553206* | *-0.01583* | *0.008478* |
| *family_anger_arg* | *-0.00102* | *0.005151* | *0.843154* | *-0.01112* | *0.009078* |
| *family_aggression* | *0.001357* | *0.003485* | *0.697063* | *-0.00547* | *0.008188* |
| *trauma_exposure* | *-0.00445* | *0.005212* | *0.392893* | *-0.01467* | *0.005763* |
| *lack_supervision* | *-0.00294* | *0.003744* | *0.431576* | *-0.01028* | *0.004394* |
| *age* | *-0.00073* | *0.00474* | *0.877326* | *-0.01002* | *0.00856* |
| *age_sq* | *-0.00122* | *0.001278* | *0.340192* | *-0.00373* | *0.001286* |

***Table S15:*** Pooled coefficients for unadjusted models of adversity and consummatory reward activation (nucleus accumbens).

| *term* | *estimate* | *std.error* | *p.value* | *conf.low* | *conf.high* |
| --- | --- | --- | --- | --- | --- |
| *(Intercept)* | *0.146215* | *0.006433* | *8.13E-113* | *0.133606* | *0.158825* |
| *pos_school_env* | *-0.00018* | *0.002611* | *0.946078* | *-0.0053* | *0.004942* |
| *ps_behav* | *-0.0007* | *0.002598* | *0.786501* | *-0.0058* | *0.004388* |
| *age* | *-0.00076* | *0.004748* | *0.872927* | *-0.01006* | *0.008546* |
| *age_sq* | *-0.00123* | *0.00128* | *0.335423* | *-0.00374* | *0.001276* |

***Table S16:*** Pooled coefficients for unadjusted models of resilience and consummatory reward activation (nucleus accumbens).

*Caudate nucleus*

| *term* | *estimate* | *std.error* | *p.value* | *conf.low* | *conf.high* |
| --- | --- | --- | --- | --- | --- |
| *(Intercept)* | *0.052909* | *0.003828* | *3.06E-43* | *0.045406* | *0.060412* |
| *cg_psych* | *-0.0038* | *0.002509* | *0.129389* | *-0.00872* | *0.001113* |
| *ses_dis_nsafety* | *-0.00786* | *0.006598* | *0.233509* | *-0.0208* | *0.005073* |
| *cg2_lack_support* | *0.003977* | *0.002704* | *0.141333* | *-0.00132* | *0.009278* |
| *cg1_lack_support* | *-0.0013* | *0.002521* | *0.605251* | *-0.00625* | *0.00364* |
| *yp_family_conflict* | *-0.00066* | *0.003329* | *0.841841* | *-0.00719* | *0.005862* |
| *cg_sub_use_bio_sep* | *0.003221* | *0.005078* | *0.525839* | *-0.00673* | *0.013174* |
| *family_anger_arg* | *-0.00281* | *0.004227* | *0.505909* | *-0.0111* | *0.005473* |
| *family_aggression* | *0.002101* | *0.002867* | *0.463702* | *-0.00352* | *0.00772* |
| *trauma_exposure* | *0.003604* | *0.004242* | *0.395542* | *-0.00471* | *0.01192* |
| *lack_supervision* | *0.000897* | *0.003068* | *0.7701* | *-0.00512* | *0.006911* |
| *age* | *-0.00172* | *0.003973* | *0.664945* | *-0.00951* | *0.006066* |
| *age_sq* | *0.000384* | *0.00107* | *0.719623* | *-0.00171* | *0.002482* |

***Table S17:*** Pooled coefficients for unadjusted models of adversity and consummatory reward activation (caudate nucleus).

| *term* | *estimate* | *std.error* | *p.value* | *conf.low* | *conf.high* |
| --- | --- | --- | --- | --- | --- |
| *(Intercept)* | *0.053068* | *0.003837* | *2.76E-43* | *0.045547* | *0.060589* |
| *pos_school_env* | *0.001926* | *0.002138* | *0.367688* | *-0.00227* | *0.006118* |
| *ps_behav* | *0.000669* | *0.002127* | *0.753034* | *-0.0035* | *0.004838* |
| *age* | *-0.00165* | *0.003977* | *0.679051* | *-0.00944* | *0.006149* |
| *age_sq* | *0.000349* | *0.001071* | *0.74483* | *-0.00175* | *0.002449* |

***Table S18:*** Pooled coefficients for unadjusted models of resilience and consummatory reward activation (caudate nucleus).

*Putamen*

| term | estimate | std.error | p.value | conf.low | conf.high |
| --- | --- | --- | --- | --- | --- |
| (Intercept) | 0.132458 | 0.005653 | 1.12E-119 | 0.121378 | 0.143539 |
| cg_psych | -0.004 | 0.002152 | 0.062919 | -0.00822 | 0.000216 |
| ses_dis_nsafety | -0.00381 | 0.005729 | 0.505791 | -0.01504 | 0.007419 |
| cg2_lack_support | 0.004627 | 0.002328 | 0.046852 | 6.44E-05 | 0.00919 |
| cg1_lack_support | -0.00126 | 0.002153 | 0.559323 | -0.00548 | 0.002965 |
| yp_family_conflict | -0.00148 | 0.002866 | 0.604942 | -0.0071 | 0.004135 |
| cg_sub_use_bio_sep | 0.00036 | 0.004396 | 0.934771 | -0.00826 | 0.008978 |
| family_anger_arg | -0.00013 | 0.003638 | 0.970838 | -0.00726 | 0.006999 |
| family_aggression | 0.003848 | 0.00246 | 0.117887 | -0.00098 | 0.00867 |
| trauma_exposure | 0.004905 | 0.003666 | 0.180895 | -0.00228 | 0.01209 |
| lack_supervision | 0.002631 | 0.002635 | 0.317999 | -0.00253 | 0.007796 |
| age | -0.00519 | 0.003348 | 0.121469 | -0.01175 | 0.001377 |
| age_sq | 0.000526 | 0.000903 | 0.560484 | -0.00124 | 0.002295 |

***Table S19:*** Pooled coefficients for unadjusted models of adversity and consummatory reward activation (putamen).

| term | estimate | std.error | p.value | conf.low | conf.high |
| --- | --- | --- | --- | --- | --- |
| (Intercept) | 0.132296 | 0.005666 | 7.56E-119 | 0.121189 | 0.143403 |
| pos_school_env | -0.00144 | 0.001837 | 0.433566 | -0.00504 | 0.002163 |
| ps_behav | -0.00127 | 0.001828 | 0.486729 | -0.00485 | 0.002312 |
| age | -0.00501 | 0.003352 | 0.135157 | -0.01158 | 0.001562 |
| age_sq | 0.00046 | 0.000904 | 0.610834 | -0.00131 | 0.002232 |

***Table S20:*** Pooled coefficients for unadjusted models of resilience and consummatory reward activation (putamen).

**References**

1 Carver CS, White TL. Behavioral inhibition, behavioral activation, and affective responses to impending reward and punishment: The BIS/BAS Scales. *J Pers Soc Psychol* 1994; **67**: 319–333.

2 Pagliaccio D, Luking KR, Anokhin AP, Gotlib IH, Hayden EP, Olino TM *et al.* Revising the BIS/BAS to Study Development: Measurement Invariance and Normative Effects of Age and Sex from Childhood through Adulthood. *Psychol Assess* 2016; **28**: 429–442.

3 Brieant A, Vannucci A, Nakua H, Harris J, Lovell J, Brundavanam D *et al.* Characterizing the dimensional structure of early-life adversity in the Adolescent Brain Cognitive Development (ABCD) Study. *Dev Cogn Neurosci* 2023; **61**: 101256.
